# Supplementary material
Source: ML conference proceedings conference paper supplement (https://proceedings.neurips.cc/paper_files/paper/2019/hash/9d7099d87947faa8d07a272dd6954b80-Abstract.html)
Supplement: Supplementary file [file 9d7099d87947faa8d07a272dd6954b80-Supplemental.zip]

## 395 A Task setup and training details

396 All code freely available at [https://github.com/nnRNN/nnRNN\\_release](https://github.com/nnRNN/nnRNN_release).

### 397 A.1 Copy task

398 For the copy task, networks are presented with an input sequence  $x_t$  of length  $10 + T_c$ . For  
399  $t = 1, \dots, 10$ ,  $x_t$  can take one of 8 distinct values  $\{a_i\}_{i=1}^8$ . For the following  $T_c - 1$  time steps,  $x_t$   
400 takes the same value  $a_9$ . At  $t = T_c$ , a cue symbol  $x_t = a_{10}$  prompts the model to recall the first 10  
401 symbols and output them sequentially in the same order they were presented. Models are trained to  
402 minimize the average cross entropy loss of symbol recalls. A model that simply predicts a constant  
403 set of output tokens for every input sequence would achieve a *baseline* loss of  $\frac{10 \log(8)}{T+20}$ . All models  
404 were trained using a mini batch size of 10. All non-gated models except "RNN" were initialized such  
405 that the recurrent network was orthogonal. The non-normal RNN had it's orthogonal weight matrix  
406 initialized as in expRNN with the log weights initialized using Henaff initialization. Importantly, all  
407 non-gated models used the *modReLU* activation function for state-to-state transitions. This is critical  
408 for the copy task since a nonlinearity makes the task very difficult to solve [VTKP17a] and *modReLU*  
409 acts as identity at initialization. Fig. 4 (left) shows cross entropy loss for all models throughout  
410 training when the number of parameters is held constant. Model and training hyperparameters are  
411 summarized in Table 2.

| Model    | hid | LR     | LR orth   | $\alpha$ | $\delta$ | $T$ decay | V init        |
|----------|-----|--------|-----------|----------|----------|-----------|---------------|
| nnRNN    | 128 | 0.0005 | $10^{-6}$ | 0.99     | 0.0001   | $10^{-6}$ | Henaff        |
| expRNN   | 128 | 0.001  | 0.0001    | 0.99     |          |           | Henaff        |
| expRNN   | 176 | 0.001  | 0.0001    | 0.99     |          |           | Henaff        |
| LSTM     | 128 | 0.0005 |           | 0.99     |          |           | Glorot Normal |
| LSTM     | 63  | 0.001  |           | 0.99     |          |           | Glorot Normal |
| RNN Orth | 128 | 0.0002 |           | 0.99     |          |           | Random orth   |
| EURNN    | 128 | 0.001  |           | 0.5      |          |           |               |
| EURNN    | 256 | 0.001  |           | 0.5      |          |           |               |
| RNN      | 128 | 0.001  |           | 0.9      |          |           | Glorot Normal |

Table 2: Hyperparameters for the copy task. Here, "hid" is hidden state size, "LR" is learning rate, "LR orth" is the learning rate of the orthogonal transition matrix (its skew symmetric matrix),  $\alpha$  is the smoothing parameter of RMSprop,  $\delta$  is as in equation 5,  $T$  decay is the weight of the L2 penalty applied on  $T$  in equation 5 and "V init" is the initialization scheme for the state transition matrix.

### 412 A.2 Sequential MNIST classification task

413 The sequential MNIST task [LJH15] measures the ability of an RNN to model complex long term  
414 dependencies. In this task, each pixel is fed into the network one at a time, after which the network  
415 must classify the digit. Permutation increases the difficulty of the problem by applying a fixed  
416 permutation to the sequence of the pixels, which creates longer term dependencies between the pixels.  
417 We train this task for all networks using mini batch sizes of 100. All non-gated networks except "RNN"  
418 were initialized with orthogonal recurrent weight matrices using Cayley initialization [HWY18].  
419 The non-normal RNN has it's orthogonal weight matrix initialized as in [LCMR19] with the log  
420 weights initialized using Cayley initialization. Fig. 4 (right) shows validation accuracy for all  
421 models throughout training when the number of parameters is held constant. Model and training  
422 hyperparameters are summarized in Table 3.

### 423 A.3 Penn Tree Bank character prediction task

424 The Penn Tree Bank character prediction task is that of predicting the next character in a text corpus  
425 at every character position, given all previous text. We trained all models sequentially on the entire

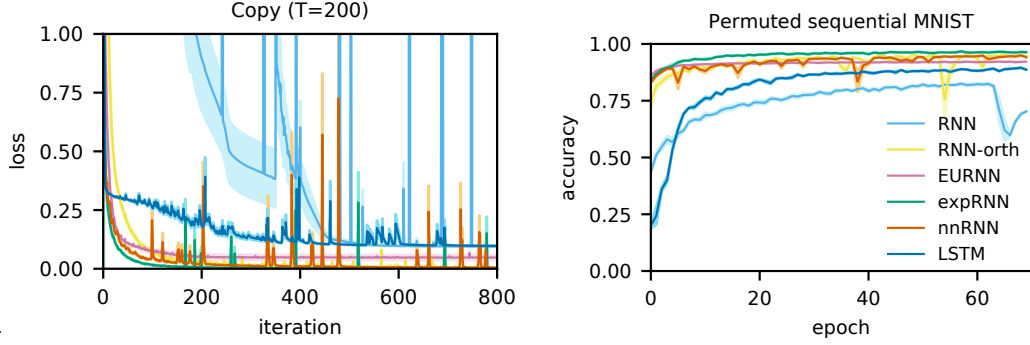

Figure 4: Holding the number of parameters constant, model performance is plotted for the copy task ( $T=200$ , left; cross-entropy loss; 18.9K parameters) and for the permuted sequential MNIST task (right; accuracy; 269K parameters). Shading indicates one standard error of the mean.

| Model    | hid  | LR            | LR orth         | $\alpha$ | $\delta$ | $T$ decay | V init        |
|----------|------|---------------|-----------------|----------|----------|-----------|---------------|
| nnRNN    | 512  | 0.00015       | $1.5 * 10^{-5}$ | 0.99     | 0.15     | 0.0001    | Cayley        |
| expRNN   | 512  | 0.0005        | $5 * 10^{-5}$   | 0.99     |          |           | Cayley        |
| expRNN   | 722  | 0.0005        | $5 * 10^{-5}$   | 0.99     |          |           | Cayley        |
| LSTM     | 512  | 0.0005        |                 | 0.9      |          |           | Glorot Normal |
| LSTM     | 257  | 0.0005        |                 | 0.9      |          |           | Glorot Normal |
| RNN Orth | 512  | $5 * 10^{-5}$ |                 | 0.99     |          |           | Random orth   |
| EURNN    | 512  | 0.0001        |                 | 0.9      |          |           |               |
| EURNN    | 1024 | 0.0001        |                 | 0.9      |          |           |               |
| RNN      | 512  | 0.0001        |                 | 0.9      |          |           | Glorot Normal |

Table 3: Hyperparameters for the permuted sequential mnist task. Here, "hid" is hidden state size, "LR" is learning rate, "LR orth" is the learning rate of the orthogonal transition matrix (its skew symmetric matrix),  $\alpha$  is the smoothing parameter of RMSprop,  $\delta$  is as in equation [5],  $T$  decay is the weight of the L2 penalty applied on  $T$  in equation [5], and "V init" is the initialization scheme for the state transition matrix.

corpus, splitting it into sequences of length 150 or 300 for truncated backpropagation through time. Consequently, the initial hidden state for a sequence is the last hidden state produced from its preceding sequence. All models were trained for 100 epochs with a mini batch size of 128. Following training, for each model, the state which yielded the best performance on the validation data was evaluated on the test data. Table 2 reports the same performance for the same model states as in Table 1 in the main text but presents test accuracy instead of BPC. Model and training hyperparameters are summarized in Table [5].

| Model    | Test Accuracy                        |                                      |                                      |                                      |
|----------|--------------------------------------|--------------------------------------|--------------------------------------|--------------------------------------|
|          | Fixed # params ( $\sim 1.32M$ )      |                                      | Fixed # hidden units ( $N = 1024$ )  |                                      |
|          | $T_{PTB} = 150$                      | $T_{PTB} = 300$                      | $T_{PTB} = 150$                      | $T_{PTB} = 300$                      |
| RNN      | $40.01 \pm 0.026$                    | $39.97 \pm 0.025$                    | $40.01 \pm 0.026$                    | $39.97 \pm 0.025$                    |
| RNN-orth | $66.29 \pm 0.07$                     | $65.53 \pm 0.09$                     | $66.29 \pm 0.07$                     | $65.53 \pm 0.09$                     |
| EURNN    | $65.68 \pm 0.002$                    | $65.55 \pm 0.002$                    | $64.01 \pm 0.002$                    | $64.20 \pm 0.003$                    |
| expRNN   | $68.07 \pm 0.15$                     | $67.58 \pm 0.04$                     | $67.51 \pm 0.11$                     | $66.89 \pm 0.024$                    |
| nnRNN    | <b><math>68.78 \pm 0.0006</math></b> | <b><math>68.52 \pm 0.0004</math></b> | <b><math>68.78 \pm 0.0006</math></b> | <b><math>68.52 \pm 0.0004</math></b> |

Table 4: PTB test performance: Test Accuracy, for sequence lengths  $T_{PTB} = 150, 300$ . Two comparisons across models shown: fixed number of parameters (left), and fixed number of hidden units (right). Error range indicates standard error of the mean.

| Model             | hid  | LR            | LR orth       | $\alpha$ | $\delta$ | $T$ decay | V init        |
|-------------------|------|---------------|---------------|----------|----------|-----------|---------------|
| <b>Length 150</b> |      |               |               |          |          |           |               |
| nnRNN             | 1024 | 0.0008        | $8 * 10^{-5}$ | 0.9      | 1        | 0.0001    | Cayley        |
| expRNN            | 1024 | 0.005         | 0.0001        | 0.9      |          |           | Cayley        |
| expRNN            | 1386 | 0.005         | 0.0001        | 0.9      |          |           | Cayley        |
| LSTM              | 1024 | 0.008         |               | 0.9      |          |           | Glorot Normal |
| LSTM              | 475  | 0.001         |               | 0.99     |          |           | Glorot Normal |
| RNN Orth          | 1024 | 0.0001        |               | 0.9      |          |           | Random orth   |
| EURNN             | 1024 | 0.001         |               | 0.9      |          |           |               |
| EURNN             | 2048 | 0.001         |               | 0.9      |          |           |               |
| RNN               | 1024 | $10^{-5}$     |               | 0.9      |          |           | Glorot Normal |
| <b>Length 300</b> |      |               |               |          |          |           |               |
| nnRNN             | 1024 | 0.0008        | $6 * 10^{-5}$ | 0.9      | 0.0001   | 0.0001    | Cayley        |
| expRNN            | 1024 | 0.005         | 0.0001        | 0.9      |          |           | Cayley        |
| expRNN            | 1386 | 0.005         | 0.0001        | 0.9      |          |           | Cayley        |
| LSTM              | 1024 | 0.008         |               | 0.9      |          |           | Glorot Normal |
| LSTM              | 475  | 0.003         |               | 0.9      |          |           | Glorot Normal |
| RNN Orth          | 1024 | 0.0001        |               | 0.9      |          |           | Cayley        |
| EURNN             | 1024 | 0.001         |               | 0.9      |          |           |               |
| EURNN             | 2048 | 0.001         |               | 0.9      |          |           |               |
| RNN               | 1024 | $1 * 10^{-5}$ |               | 0.9      |          |           | Glorot Normal |

Table 5: Hyperparameters for the Penn Tree Bank task (at 150 and 300 time step truncation for gradient backpropagation). Here, "hid" is hidden state size, "LR" is learning rate, "LR orth" is the learning rate of the orthogonal transition matrix (its skew symmetric matrix),  $\alpha$  is the smoothing parameter of RMSprop,  $\delta$  is as in equation 5,  $T$  decay is the weight of the L2 penalty applied on  $T$  in equation 5, and "V init" is the initialization scheme for the state transition matrix.

#### A.4 Hyperparameter search

For all models with a state transition matrix that is initialized as orthogonal (nnRNN, expRNN, RNN-orth), three orthogonal initialization schemes were tested: (1) random, (2) Cayley, and (3) Henaff. Random initialization is achieved by sampling a random matrix whose QR decomposition yields an orthogonal matrix with positive determinant 1 and then mapping this orthogonal matrix via a matrix logarithm to the skew symmetric parameter matrix used in expRNN. Cayley and Henaff initialize this skew symmetric matrix as described in [LCMR19]. The vanilla RNN is also tested with a Glorot Normal initialization, with the model then referred to as simply "RNN".

For training, learning rates were searched between 0.01 and 0.0001 in increments of 0.0001, 0.0002 or  $10\times$ ; the learning rate for the orthogonal matrix was always kept near  $10\times$  lower; and RMSprop was used as the optimizer with smoothing parameter  $\alpha$  as 0.5, 0.9, or 0.99. In equation 5,  $\delta$  was searched in 0, 0.0001, 0.001, 0.01, 0.1, 0.15, 1.0, 10; the L2 decay on the strictly upper triangular part of the transition matrix  $T$  was searched in 0,  $10^{-6}$ ,  $10^{-5}$ ,  $10^{-4}$ .

## B Fisher Memory Curves for strictly lower-triangular matrices

Let,  $\Theta$  be a strictly lower triangular matrix such that  $[\Theta]_{i+1,i} = \sqrt{\alpha}$  for  $1 \leq i \leq N-1$  and  $A$  be the associated lower triangular Gram-Schmidt orthogonalization matrix. We have that,

$$\Theta = DA \quad (6)$$

where  $D$  is the delay line,  $D_{i+1,i} = \sqrt{\alpha}$  and  $A_{i,i} = 1$  for  $1 \leq i \leq N$ . Let us recall the expression of  $J(k)$  for independent Gaussian noise derived by [GHS08b, Eq. 3],

$$J(k) = U^T (\Theta^k)^\top C_n^{-1} \Theta^k U, \quad \text{where} \quad C_n = \epsilon \sum_{k=0}^{\infty} \Theta^k (\Theta^k)^\top, \quad (7)$$

451 and  $U = [1, 0, \dots, 0]$  is the source. We have that for any vector  $u$ ,

$$u^\top C_n u = \epsilon \sum_{k=0}^{\infty} ((D^k)^\top u)^\top A A^\top ((D^k)^\top u) \quad (8)$$

$$= \epsilon \sum_{k=0}^{N-1} ((D^k)^\top u)^\top A A^\top ((D^k)^\top u) \quad (9)$$

$$\leq \epsilon \sigma_{\max}^{2(N-1)}(A) \sum_{k=0}^{N-1} u^\top D^k (D^k)^\top u \quad (10)$$

452 where for the first equality we used the fact that  $\Theta$  is nilpotent and for the last inequality the fact that  
 453  $\sigma_{\max}(A) \geq 1$ . Recall that for two symmetric matrices we define:  $A \succeq B$  if and only if  $A - B$  is  
 454 positive semidefinite. By definition we have,

$$C_n \preceq \epsilon \sigma_{\max}^{2(N-1)}(A) \sum_{k=0}^{\infty} D^k (D^k)^\top = \epsilon \sigma_{\max}^2(A) \left( \text{diag}(1, \frac{1-\alpha^2}{1-\alpha}, \dots, \frac{1-\alpha^N}{1-\alpha}) \right) \quad (11)$$

455 where the last equality is due to  $[D^k (D^k)^\top]_{i,j} = \alpha^k$  if  $i = j \leq k + 1$  and 0 otherwise. Thus  
 456 using [Lax07, Theorem 2 P. 146] we can take the inverse to get,

$$C_n^{-1} \succeq \frac{1}{\epsilon \sigma_{\max}^{2(N-1)}(A)} \left( \text{diag}(1, \frac{1-\alpha^2}{1-\alpha}, \dots, \frac{1-\alpha^N}{1-\alpha}) \right)^{-1} = \frac{1}{\epsilon \sigma_{\max}^{2(N-1)}(A)} \text{diag}(1, \frac{1-\alpha}{1-\alpha^2}, \dots, \frac{1-\alpha}{1-\alpha^N})$$

457 Finally, using that  $\Theta^k U = [\underbrace{0, \dots, 0}_k, \sqrt{\alpha^k}, *, \dots, *]$ , we have that for  $0 \leq k \leq N - 1$ ,

$$J(k) = U^\top (\Theta^k)^\top C_n^{-1} \Theta^k U \quad (12)$$

$$\geq \frac{1}{\epsilon \sigma_{\max}^{2(N-1)}(A)} \alpha^k \frac{\alpha - 1}{\alpha^{k+1} - 1}. \quad (13)$$

| $\alpha$ | $\beta$ | $d$ | $J_{\text{tot}} = \sum_{t=0}^{\infty} J(t)$ |
|----------|---------|-----|---------------------------------------------|
| 0.95     | 0.0     | 0.0 | 3.03                                        |
| 1.00     | 0.0     | 0.0 | 5.19                                        |
| 1.05     | 0.0     | 0.0 | 12.1                                        |
| 0.95     | 0.005   | 0.0 | 3.18                                        |
| 1.00     | 0.005   | 0.0 | 5.30                                        |
| 1.05     | 0.005   | 0.0 | 12.1                                        |
| 0.95     | 0.0     | 0.2 | 12.0                                        |
| 1.00     | 0.0     | 0.2 | 16.2                                        |
| 1.05     | 0.0     | 0.2 | 20.5                                        |
| 0.95     | 0.005   | 0.2 | 12.1                                        |
| 1.00     | 0.005   | 0.2 | 16.3                                        |
| 1.05     | 0.005   | 0.2 | 20.4                                        |

Table 6: Fisher memory curve performance: Shown is the sum of the FMC for the models considered in section 3.

458

## 459 C Numerical instabilities of the Schur decomposition

460 The Schur decomposition is computed via multiple iterations of the QR algorithm. The QR algorithm  
 461 is known to be *backward stable*, which gives accurate answers as long as the eigenvalues of the matrix  
 462 at hand are well-conditioned, as is explained in [ABB<sup>+</sup>99].

463 Eigenvalue-sensitivity is measured by the angle formed between the left and right eigenvectors of  
 464 the same eigenvalues. Normal matrices have coinciding left and right eigenvectors but non-normal

matrices do not, and thus certain non-normal matrices such as the Grcar matrix have very high eigenvalue-sensitivity, and thus gives rise to inaccuracies in the Schur decomposition. This motivates training the connectivity matrix in the Schur decomposition directly instead of applying the Schur decomposition in a separate step.

## D Learned connectivity structure on psMNIST

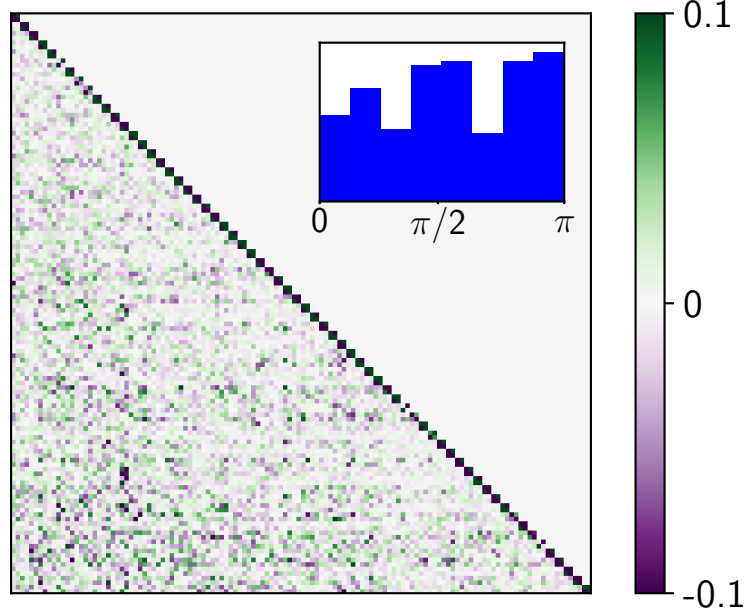

Figure 5: *Learned  $\Theta$  on psMNIST task. Inset: angles  $\theta_i$  distribution of block diagonal rotations. (c.f. Eq 4).*

For completeness, let us take a look at the Schur matrix after training on psMNIST in Fig. 5. We can see that the distribution of learned angles in the rotation blocks is rather flat, and thus is very different from the distribution learned in the PTB task, as can be seen in Fig. 3. The flatness in distribution comes somewhat close to the flatness of the learned angle distribution in the copy task. In other words, the angle distribution in the PTB task is highly structured, while in the Copy task and psMNIST task, it seems to be close to uniform.

Furthermore, we can also observe that the connectivity structure learned in the lower triangle is significantly weaker in the psMNIST task than in the PTB task, while not being completely absent as in the copy task.

Thus it seems that we can spot a spectrum of connectivity structure:

- the Copy task, with no connectivity structure in the lower triangle, close to uniform angle distribution and the absence of a delay line, on the one end.
- the PTB task, with a lot of connectivity structure in the lower triangle, a very narrow angle distribution and the presence of a delay line, on the other end.

For the psMNIST task, it appears that we are located somewhere in the middle of that spectrum.
